# Supplementary material for: Color vision evolution in egg-laying mammals: insights from visual photoreceptors and daily activities of Australian echidnas
Source: PubMed Central journal article supplement (PMC10759620; doi:10.1186/s40851-023-00224-7), 2024-01-02

**Fig. S1**

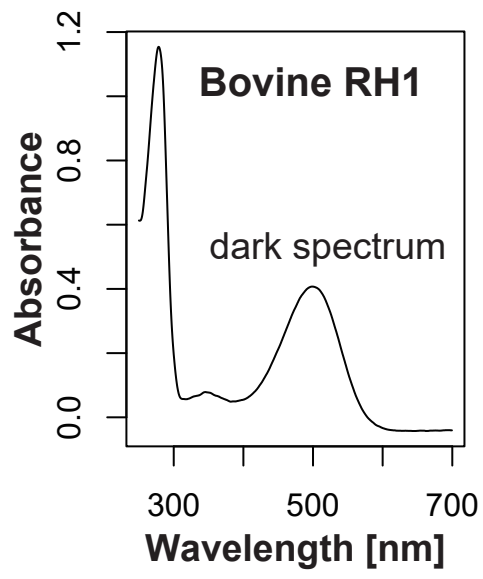

Supplement: 40851_2023_224_MOESM1_ESM.pdf [file 40851_2023_224_MOESM1_ESM.pdf]
